# Supplementary material
Source: PubMed Central journal article supplement (PMC5949725)
Supplement: ml8b00060_si_001.pdf [file ml8b00060_si_001.pdf]

## SUPPORTING INFORMATION

Title: Radiosynthesis and evaluation of [<sup>11</sup>C]HD-800, a high affinity brain penetrant PET tracer for imaging microtubules

Authors: Kumar Solingapuram Sai, Jaya Prabhakaran, Christopher Whitlow, Gayathri Ramanathan, Stephanie Rideout, Akiva Mintz, J. John Mann, and J S Dileep Kumar\*

Supporting information content:

1. Molecular formula strings of key chemicals
2. <sup>1</sup>H NMR spectra of compound **4**
3. Binding affinity of HD-800 to brain targets (Table 1)
4. Semipreparative HPLC chromatogram of [<sup>11</sup>C]HD-800
5. Analytical HPLC chromatogram of [<sup>11</sup>C]HD-800
6. Analytical HPLC chromatograms of [<sup>11</sup>C]HD-800 and unlabeled HD-800

### **#1. Molecular formula strings of key chemicals**

Compound 3: CN(C1=CC=C(OC)C=C1)C2=C3C(OC=C3C)=NC=N2

Compound [<sup>11</sup>C]3: CN(C1=CC=C(O[11CH3])C=C1)C2=C3C(OC=C3C)=NC=N2

Compound 4: CN(C1=CC=C(O)C=C1)C2=C3C(OC=C3C)=NC=N2

## #2. $^1\text{H}$ NMR spectra of compound 4

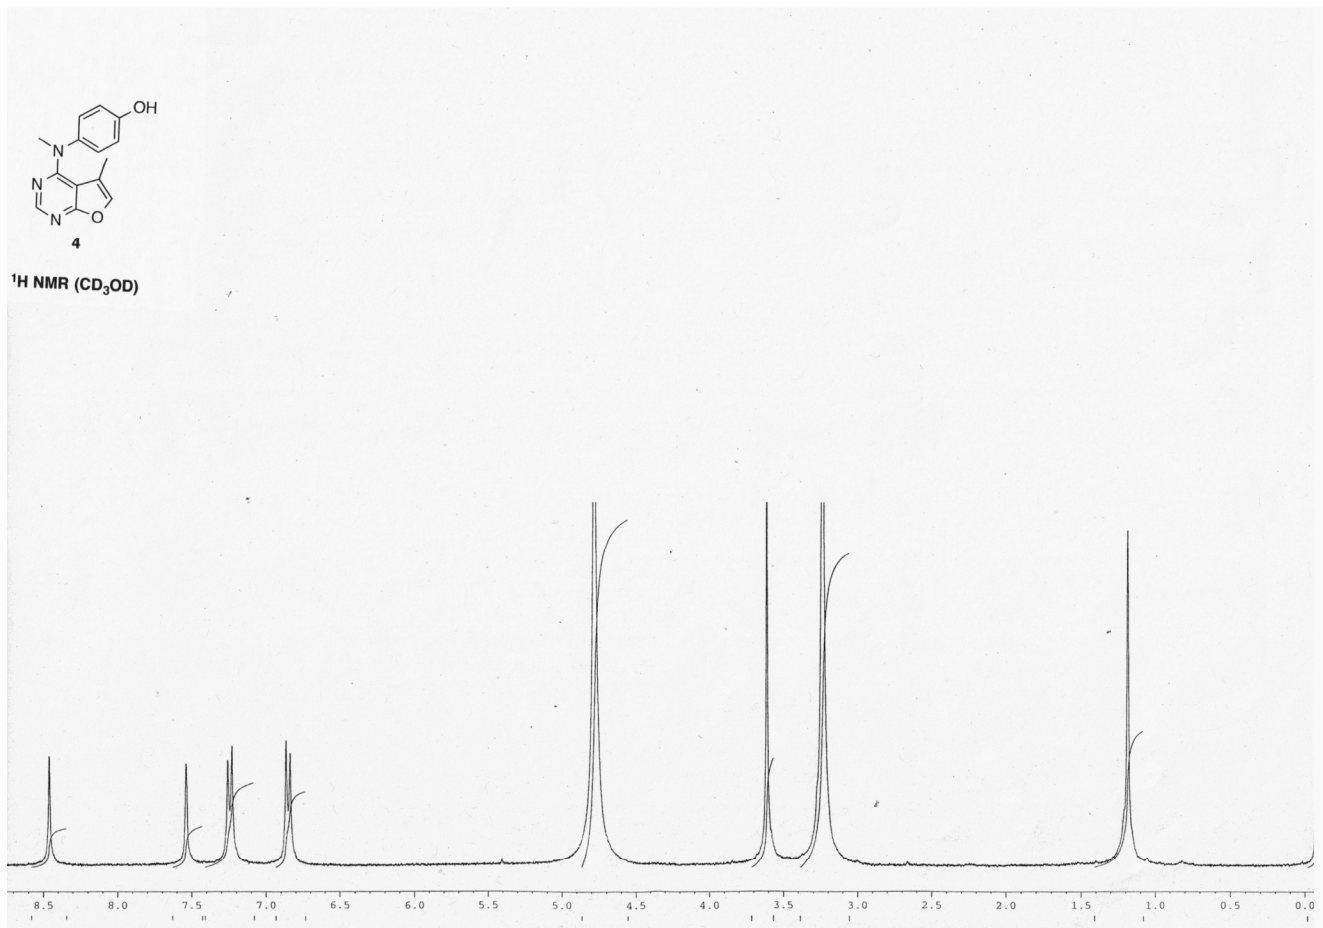

### **#3. Binding affinity of HD-800 to brain targets (Table 1)**

Table 1. Affinity of HD-800 to brain targets.

| Targets                 | Affinity (nM) | Targets                 | Affinity (nM) |
|-------------------------|---------------|-------------------------|---------------|
| MT                      | IC50 3.235    | 5-HT1A-1E               | >10,000       |
| MT                      | GI50 <1035    |                         |               |
| 5-HT2A-2C               | >10,000       | 5-HT3-7                 | >10,000       |
| 5-HT2A-2C               | >10,000       | A                       | >10,000       |
| 5-HT3-7                 | >10,000       | α1A-1C                  | >10,000       |
| α <sub>2</sub> -2C      | >10,000       | β <sub>2</sub> -3       | >10,000       |
| AMPA                    | >10,000       | BZP                     | >10000        |
| Ca <sup>+</sup> channel | >10,000       | CB1, CB2                | >10,000       |
| D1-D5                   | >10,000       | DAT                     | >10,000       |
| DOR                     | >10,000       | H1                      | >10,000       |
| H2                      | >10,000       | H3, H4                  | >10,000       |
| HERG                    | >10,000       | GABA                    | >10,000       |
| EP                      | >10,000       | I                       | >10,000       |
| KOR                     | >10,000       | KA                      | >10,000       |
| M                       | >10,000       | mGluR                   | >10,000       |
| MDR1                    | >10,000       | MOR                     | >10,000       |
| NET                     | >10,000       | NK                      | >10,000       |
| NPY                     | >10,000       | NOP                     | >10,000       |
| NT                      | >10,000       | Oxytocin                | >10,000       |
| PBR                     | 2364          | PKC                     | >10,000       |
| SERT                    | >10,000       | Sigma1                  | >10,000       |
| Sigma 2                 | >10,000       | Na <sup>+</sup> Channel | >10,000       |
| Smoothened              | >10,000       | VMAT 1,2                | >10,000       |

MT: microtubule; 5-HT: 5-hydroxytryptamin; A: adenosine; α: alpha; β: beta; BZP: benzodiazepine; AMPA: R-amino-3-hydroxy-5-methyl-4-isoxazolepropionic acid; CB: cannabinoid; D: dopamine; DAT: dopamine transporters; DOR: delta opioid receptors; EP: prostanoid receptors; GABA: gamma-amino butyric acid; H: histamine; hERG: human ether-a-go-go; KA: Kainate; KOR: kappa opioid receptors; M: muscarinic; MDR: multidrug resistance; MOR: mu opioid receptor; mGluR: metabotropic glutamate receptors; NMDA: N-methyl-D-aspartic acid; NK: neurokinin; NET: norepinephrine transporter; NT: neurotrophin; PKC: Protein kinase C; SERT: serotonin transporter; V: vasopressin; VMAT: vesicular monoamine transporter

#### #4. Semipreparative HPLC chromatogram of [<sup>11</sup>C]HD-800

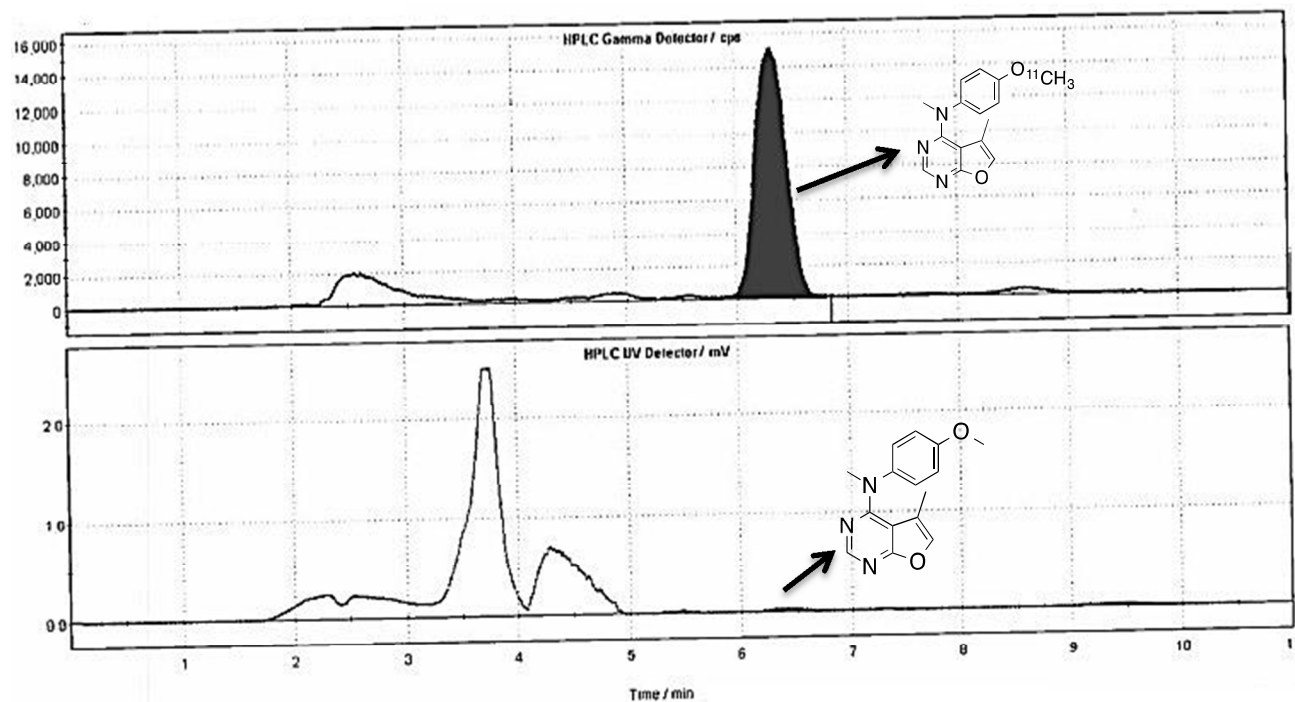

|                      | Retention time | Component               |
|----------------------|----------------|-------------------------|
| UV detector @ 254 nm | 6.4 min        | HD800                   |
| Rad detector         | 6.3 min        | [ <sup>11</sup> C]HD800 |

**#5. Analytical HPLC chromatogram of [<sup>11</sup>C]HD-800**

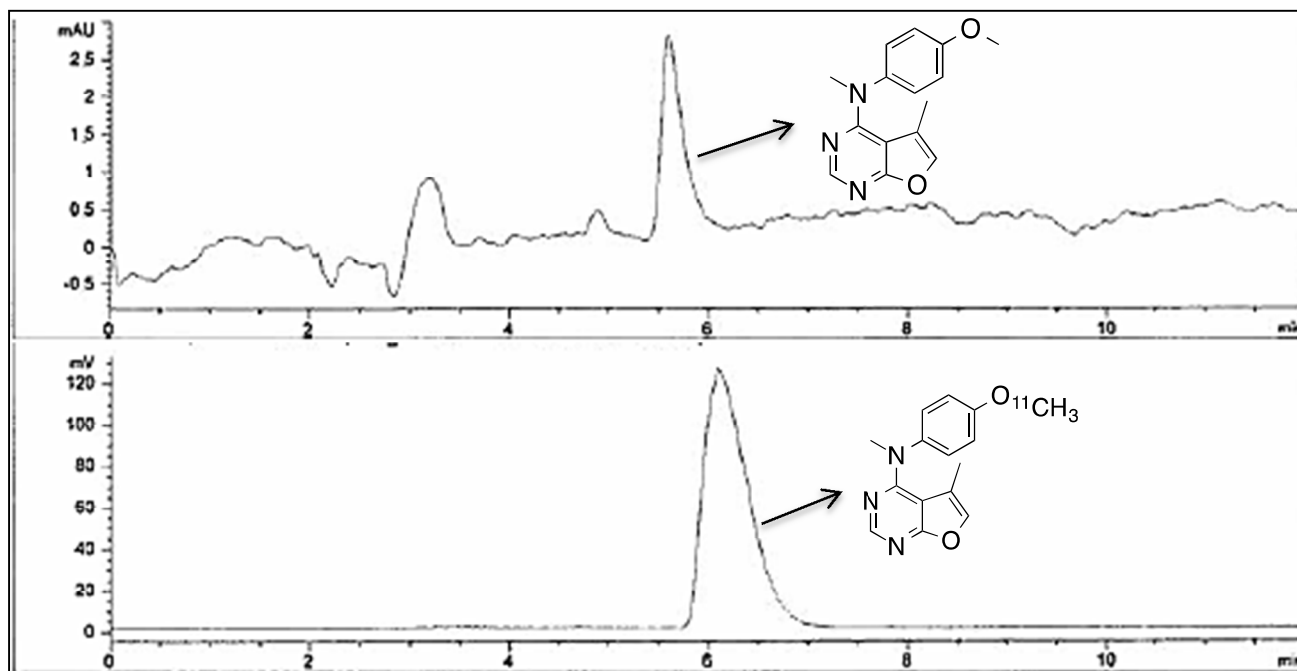

|                      | Retention time | Component               |
|----------------------|----------------|-------------------------|
| UV detector @ 254 nm | 5.67 min       | HD800                   |
| Rad detector         | 6.01 min       | [ <sup>11</sup> C]HD800 |

**#6. Analytical HPLC chromatograms of [<sup>11</sup>C]HD-800 and unlabeled HD-800**

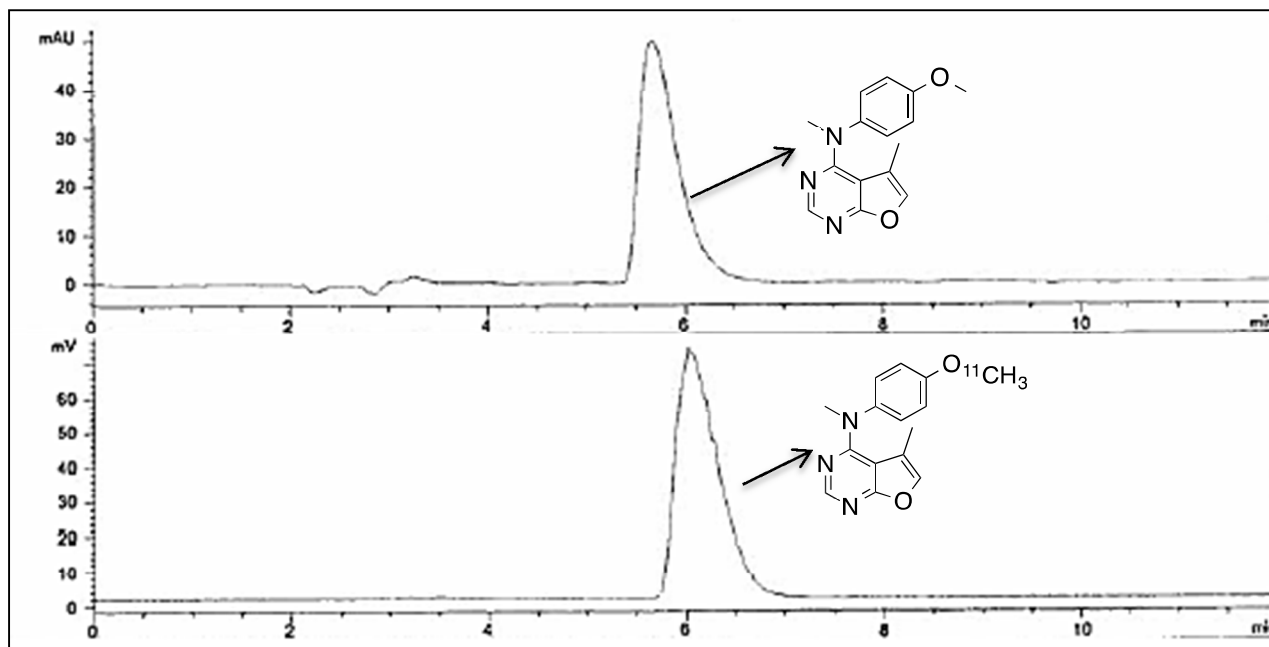

|                      | Retention time | Component               |
|----------------------|----------------|-------------------------|
| UV detector @ 254 nm | 5.67 min       | HD800                   |
| Rad detector         | 6.01 min       | [ <sup>11</sup> C]HD800 |
